# Supplementary material
Source: MDPI journal article supplement (https://www.mdpi.com/1996-1073/11/5/1321)
Supplement: s1 [file s1]

Supplementary Materials

# Reconstruction of Hydraulic Fractures Using Passive Ultrasonic Travel-Time Tomography

Wei Zhu, Xu Chang, Yibo Wang, Hongyu Zhai and Zhenxing Yao

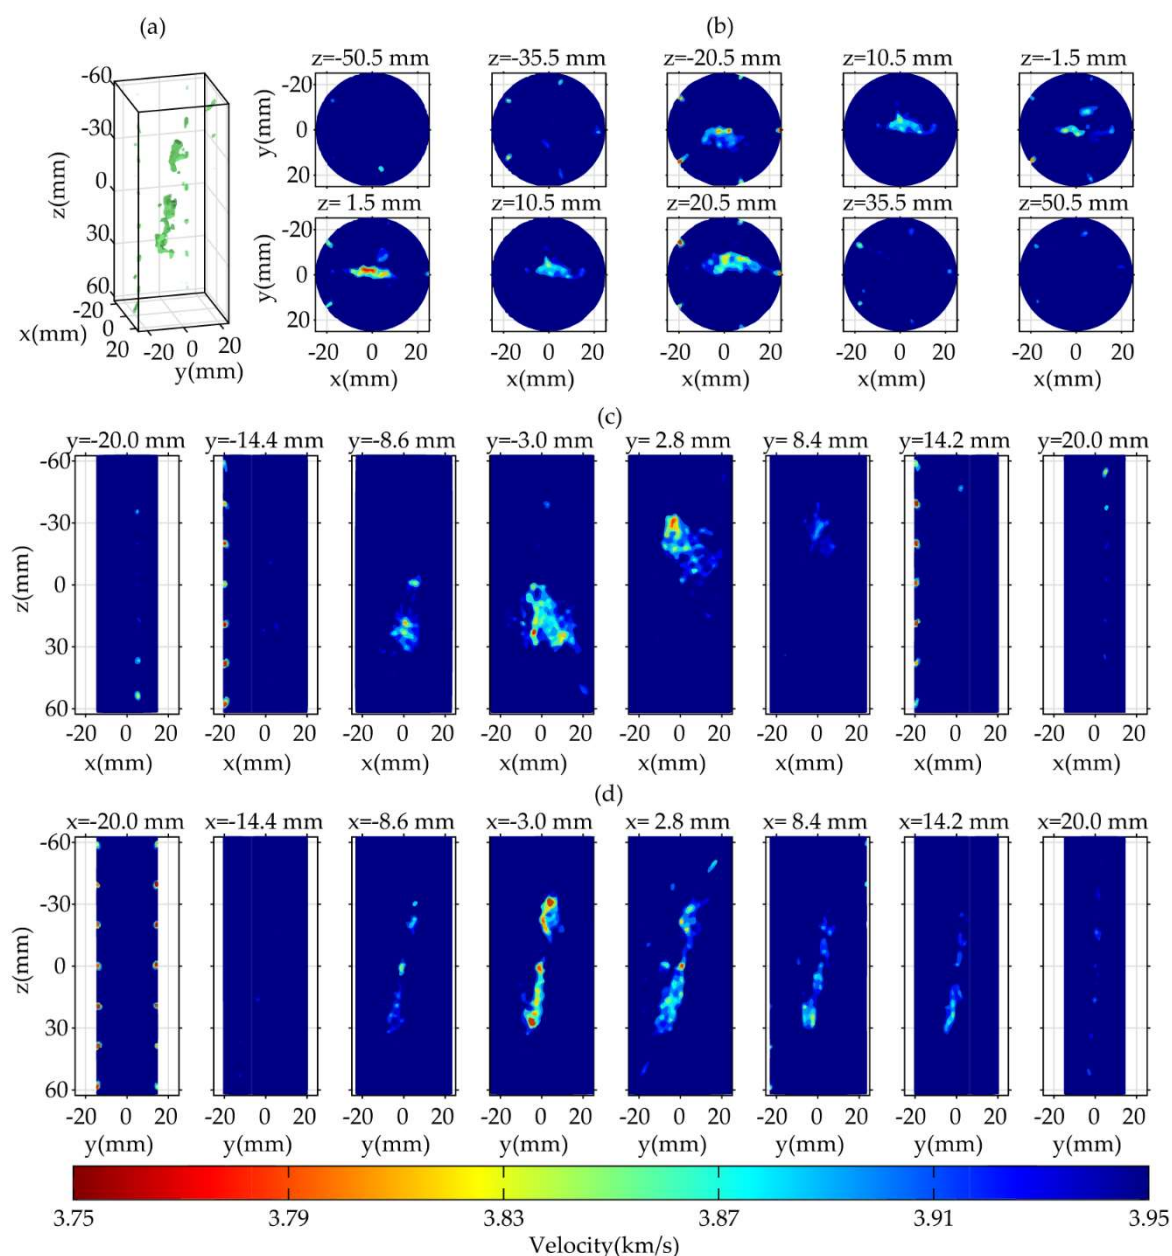

**Figure S1.** Tomographic images of Tikh under sparse ray coverage case (RNL=0.1%). (a) the 3D segmented image; (b) the transverse-view profile; (c) the coronal-view profile; and (d) the sagittal-view profile. The caption of each sub-image in (b–d) represents the profile position.

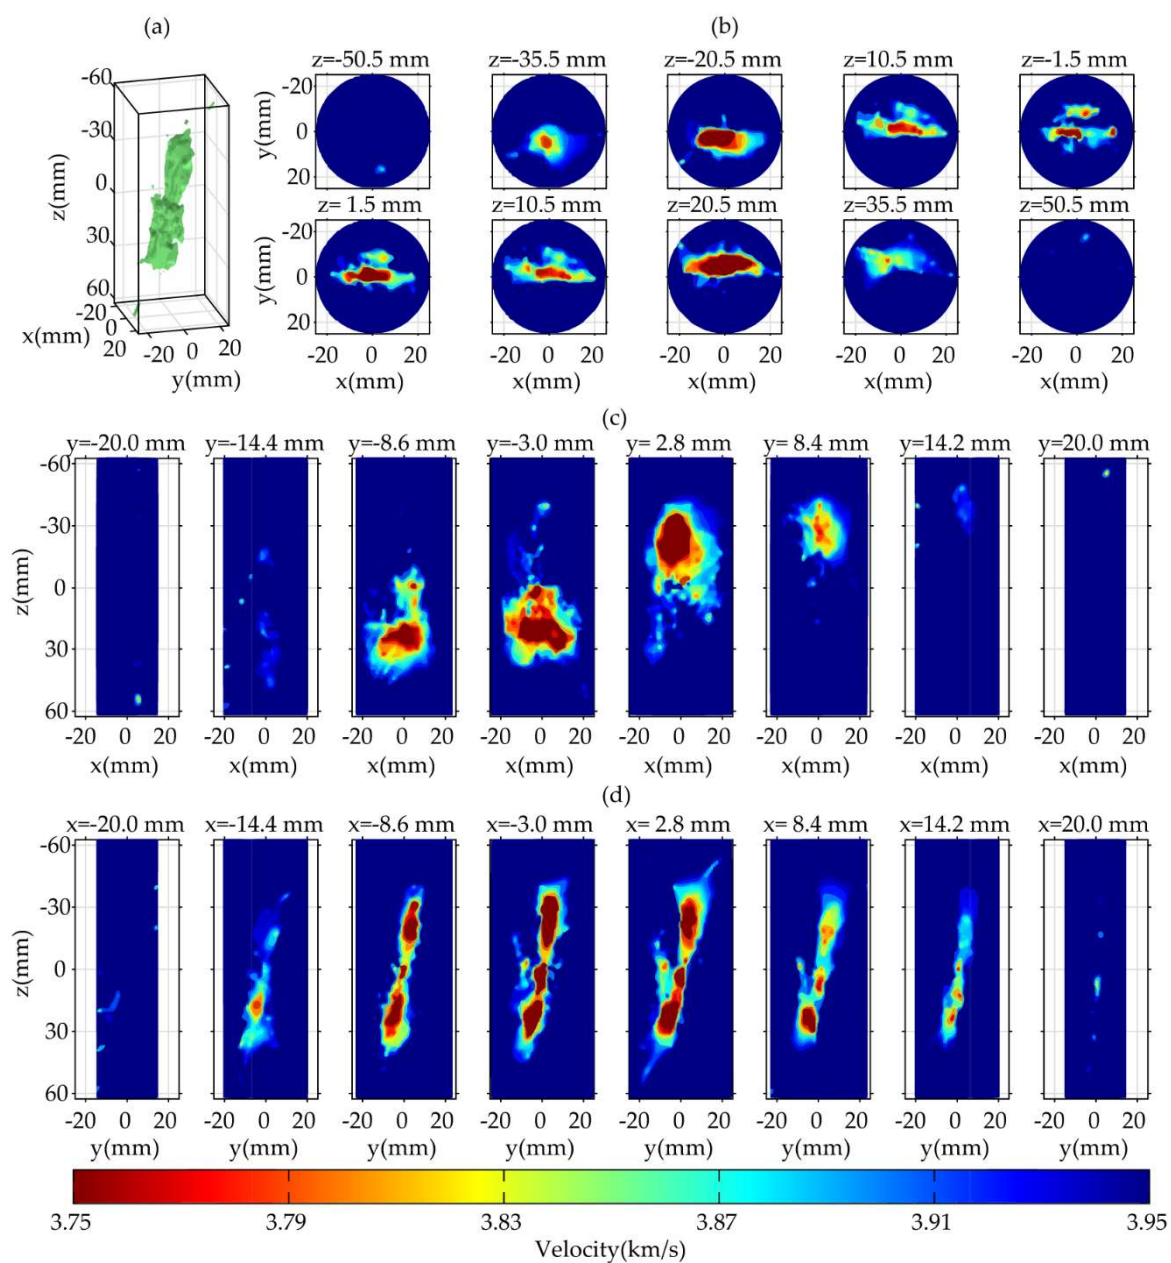

**Figure S2.** Tomographic images of TVR under sparse ray-coverage (RNL=0.1%). (a) the 3D segmented image; (b) the transverse-view profile; (c) the coronal-view profile; and (d) the sagittal-view profile. The caption of each sub-image in (b–d) represents the profile position.

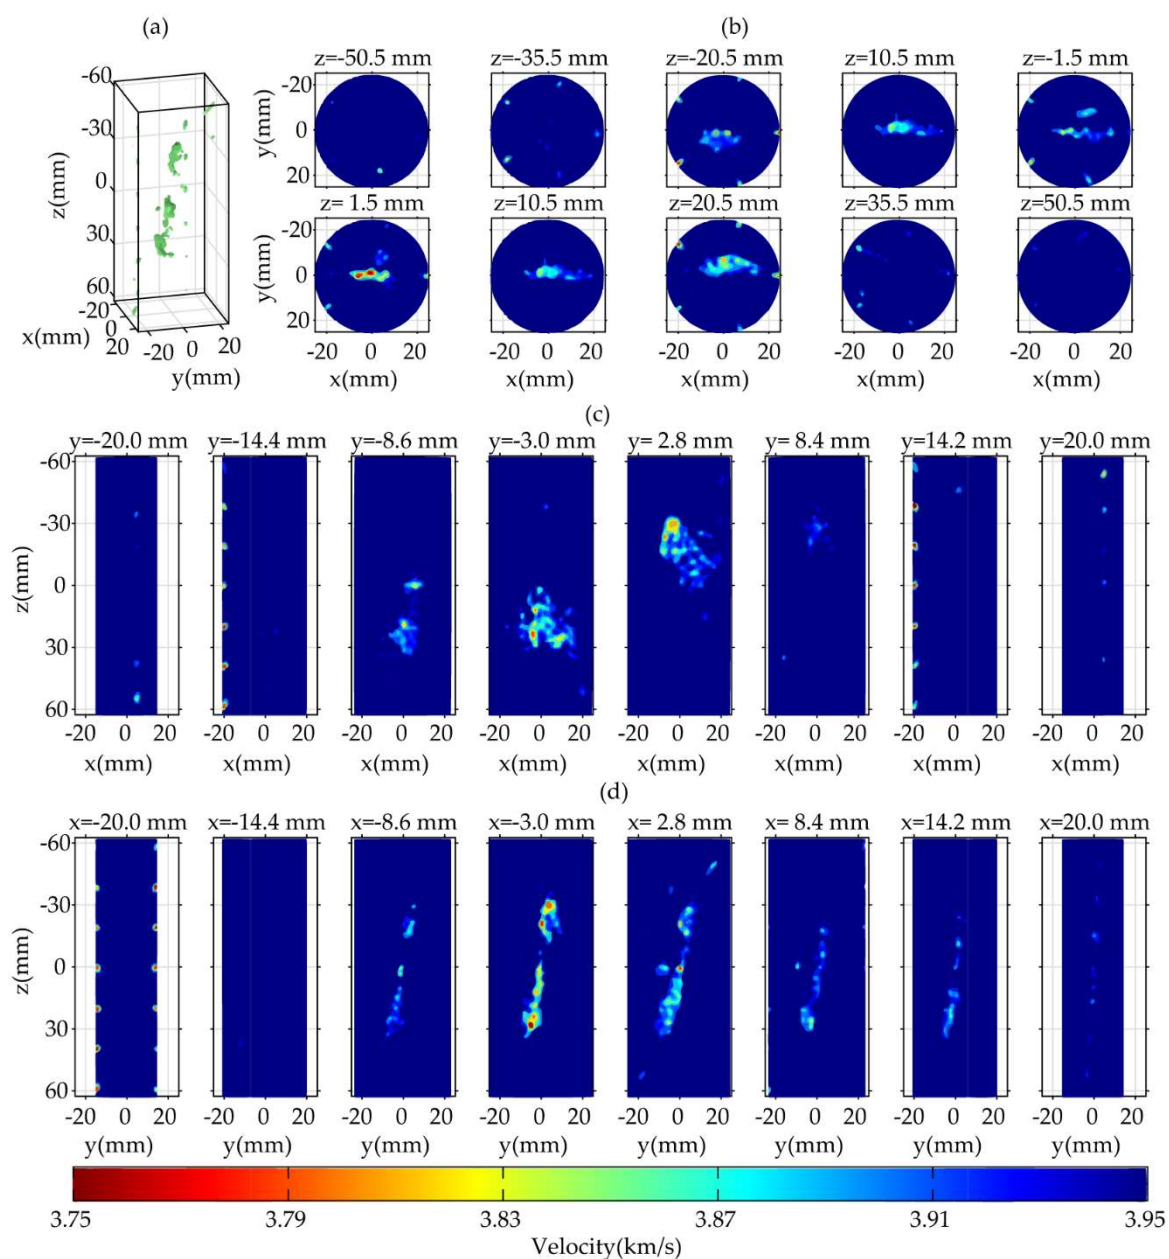

**Figure S3.** Tomographic images of Tikh under sparse ray coverage case (RNL=0.5%). (a) the 3D segmented image; (b) the transverse-view profile; (c) the coronal-view profile; and (d) the sagittal-view profile. The caption of each sub-image in (b–d) represents the profile position.

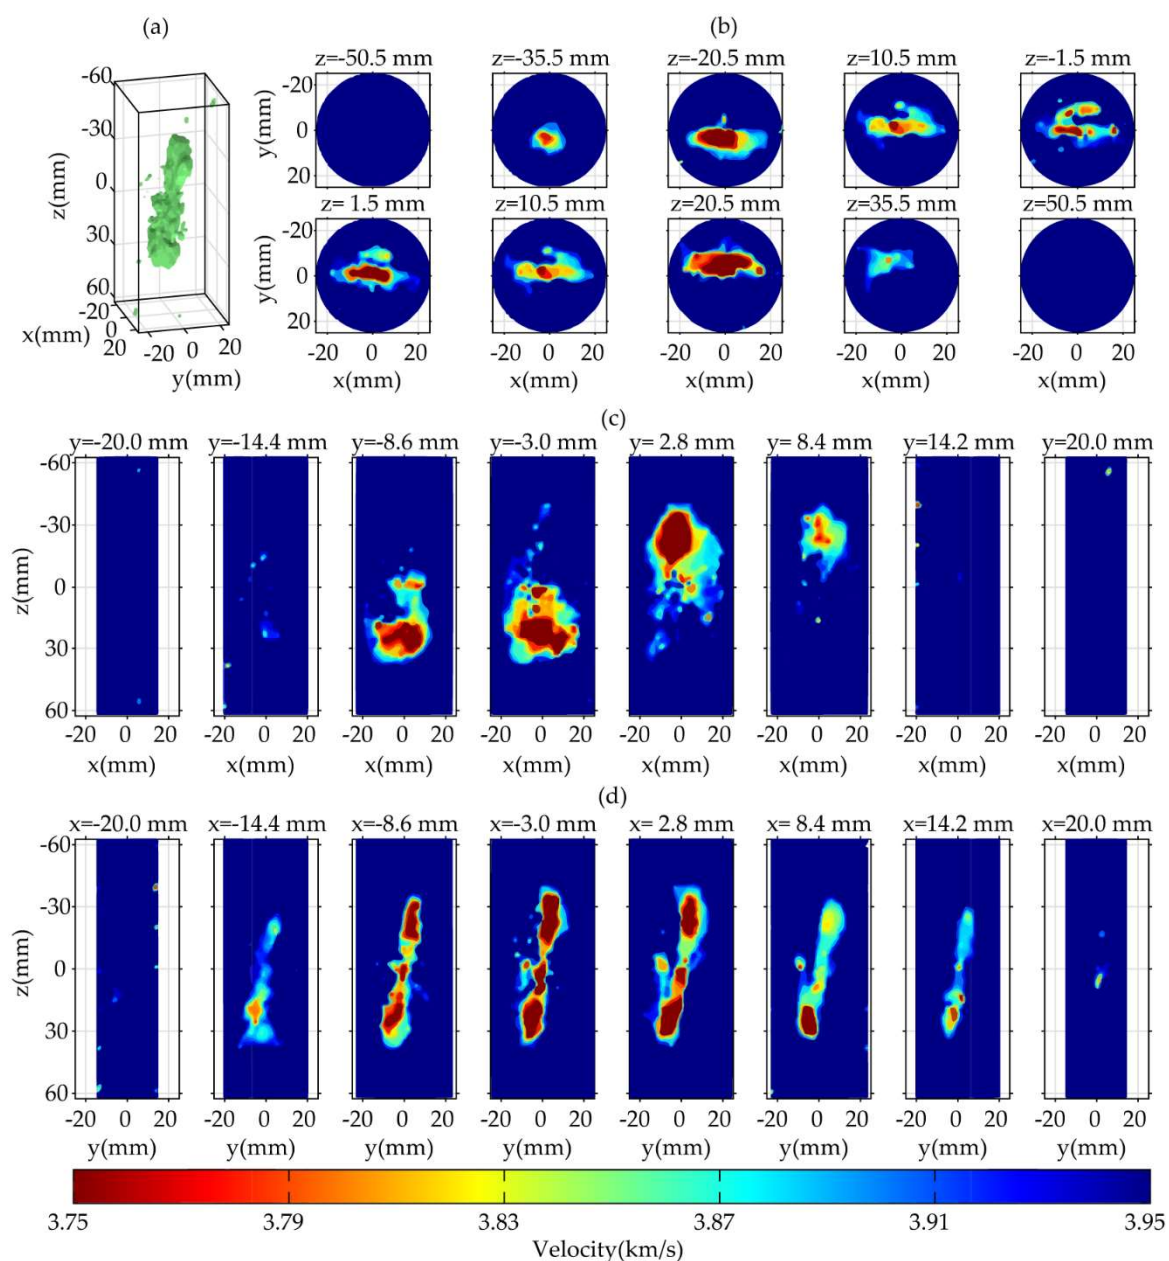

**Figure S4.** Tomographic images of TVR under sparse ray-coverage (RNL=0.5%). (a) the 3D segmented image; (b) the transverse-view profile; (c) the coronal-view profile; and (d) the sagittal-view profile. The caption of each sub-image in (b–d) represents the profile position.



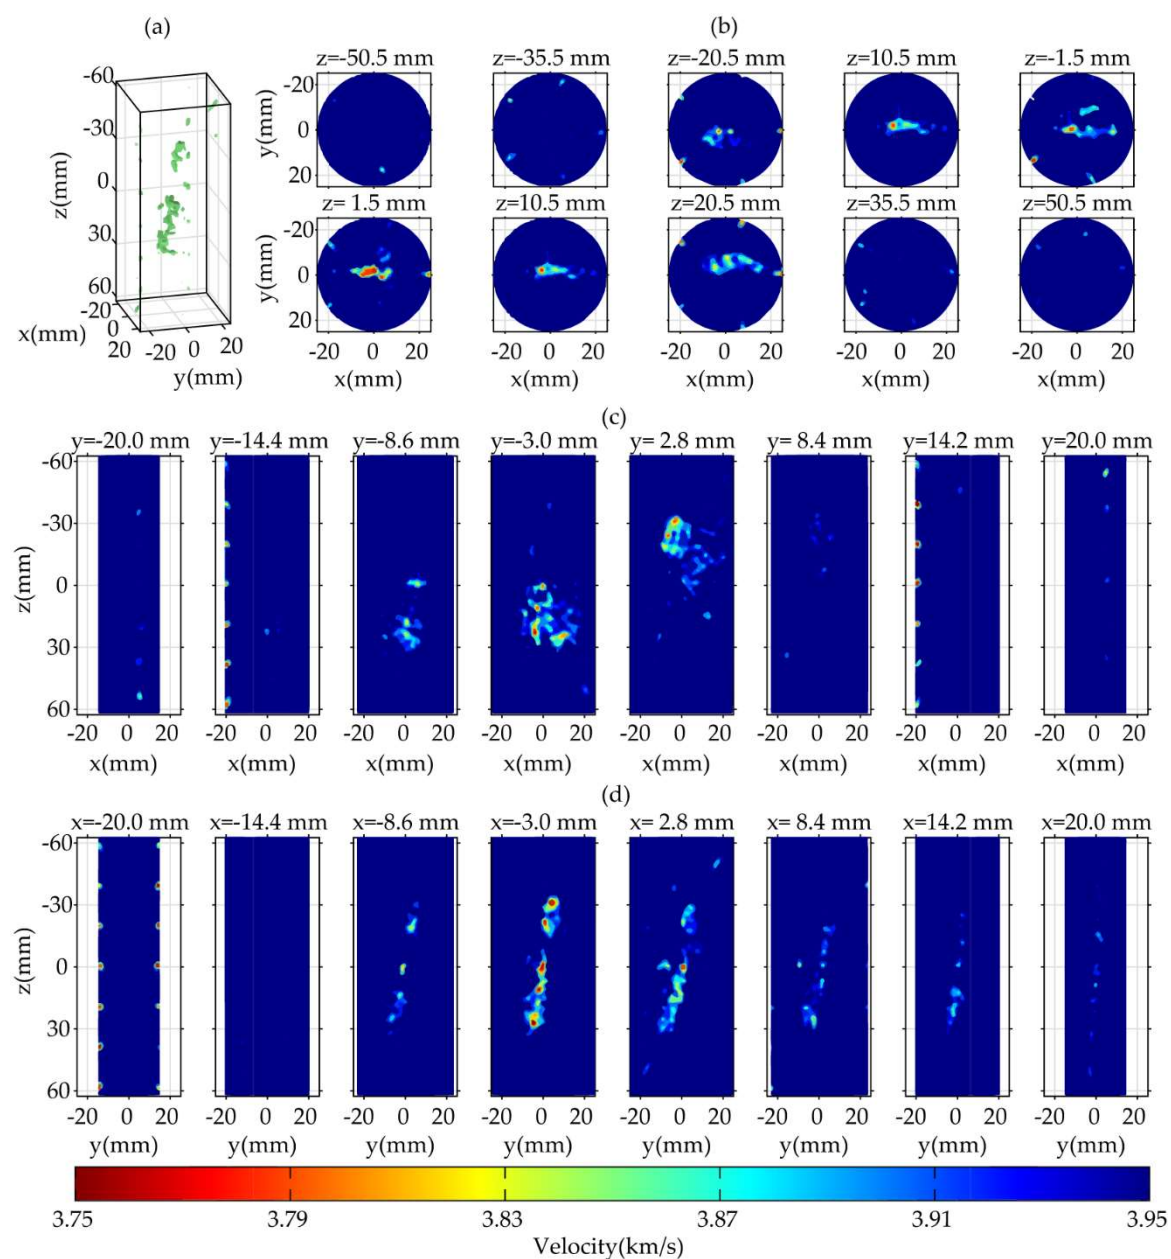

**Figure S5.** Tomographic images of Tikh under sparse ray coverage case (RNL=1%). (a) the 3D segmented image; (b) the transverse-view profile; (c) the coronal-view profile; and (d) the sagittal-view profile. The caption of each sub-image in (b–d) represents the profile position.

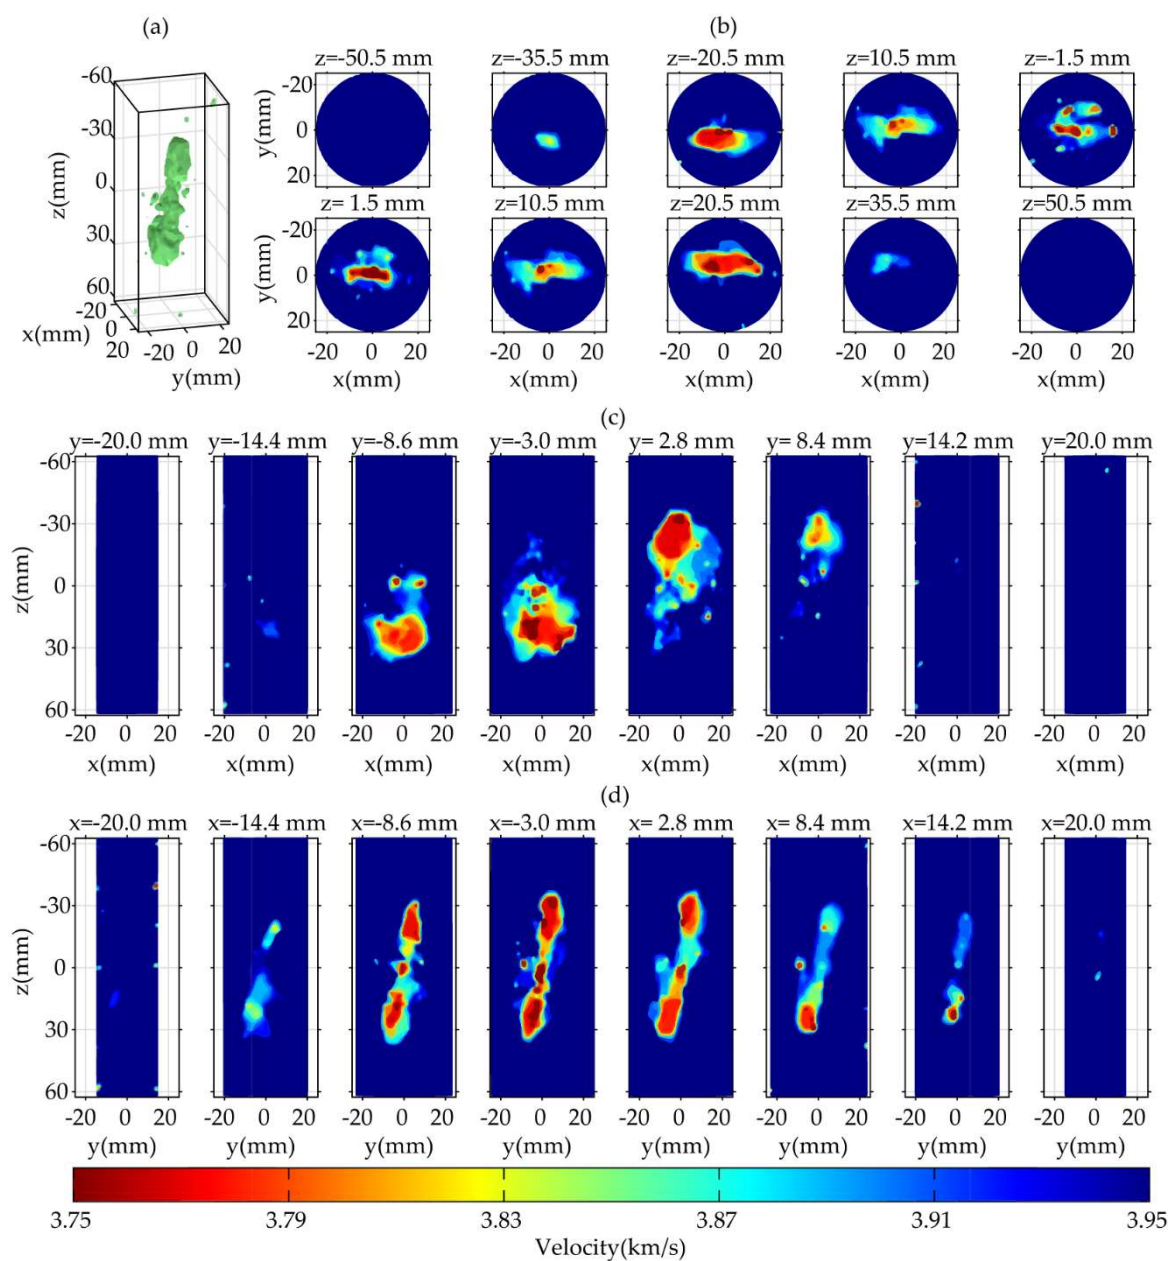

**Figure S6.** Tomographic images of TVR under sparse ray-coverage (RNL=1%). (a) the 3D segmented image; (b) the transverse-view profile; (c) the coronal-view profile; and (d) the sagittal-view profile. The caption of each sub-image in (b–d) represents the profile position.

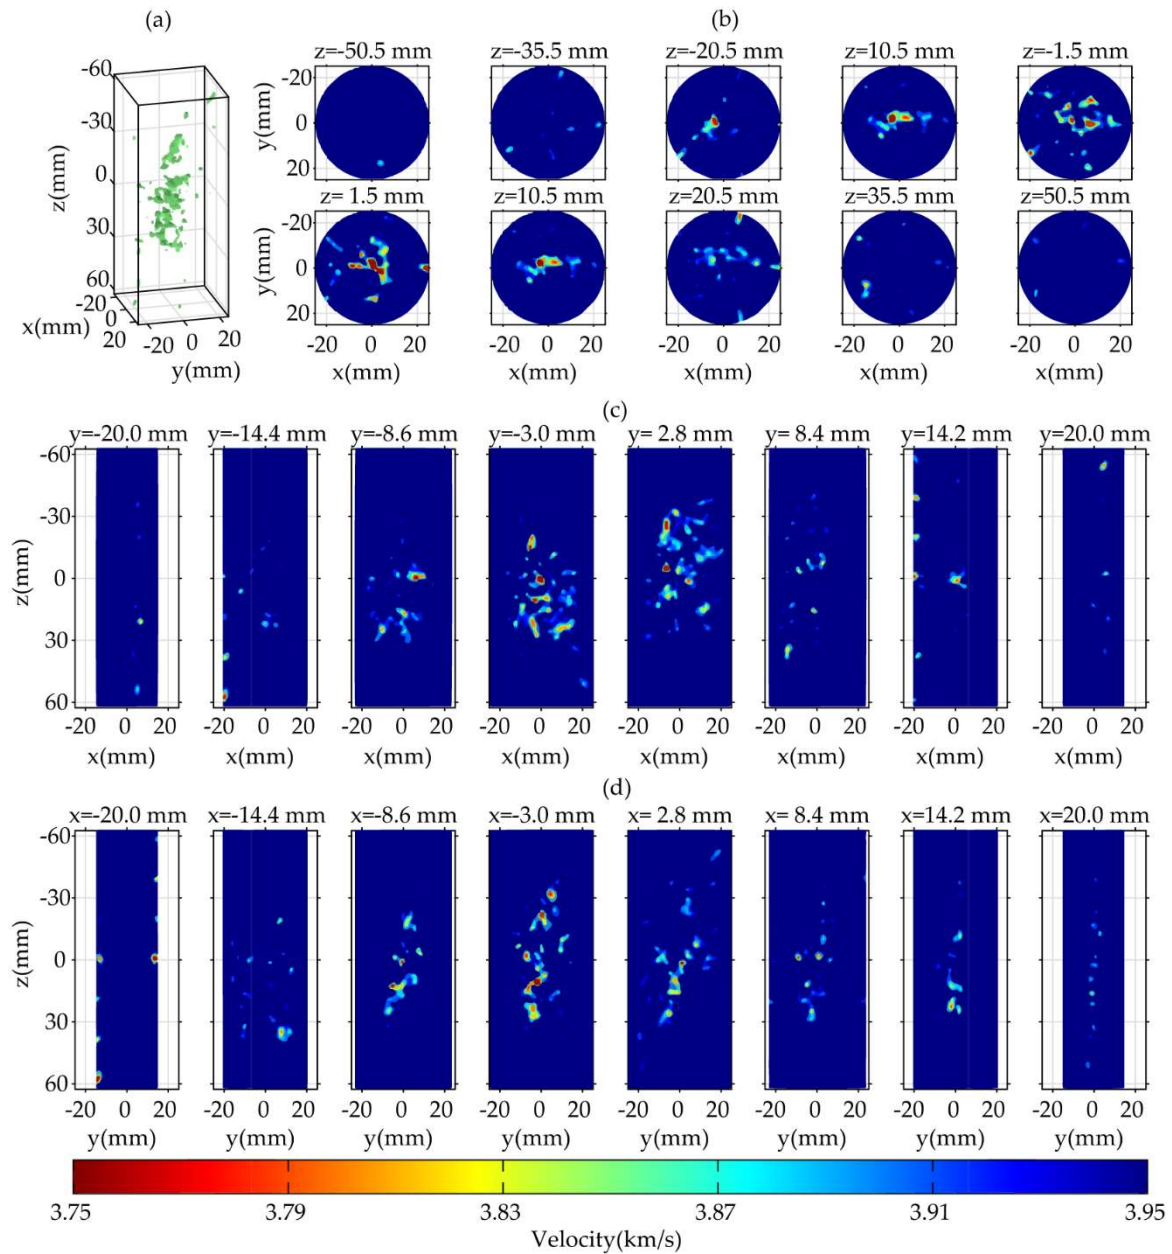

**Figure S7.** Tomographic images of Tikh under sparse ray coverage case (RNL=3%). (a) the 3D segmented image; (b) the transverse-view profile; (c) the coronal-view profile; and (d) the sagittal-view profile. The caption of each sub-image in (b–d) represents the profile position.

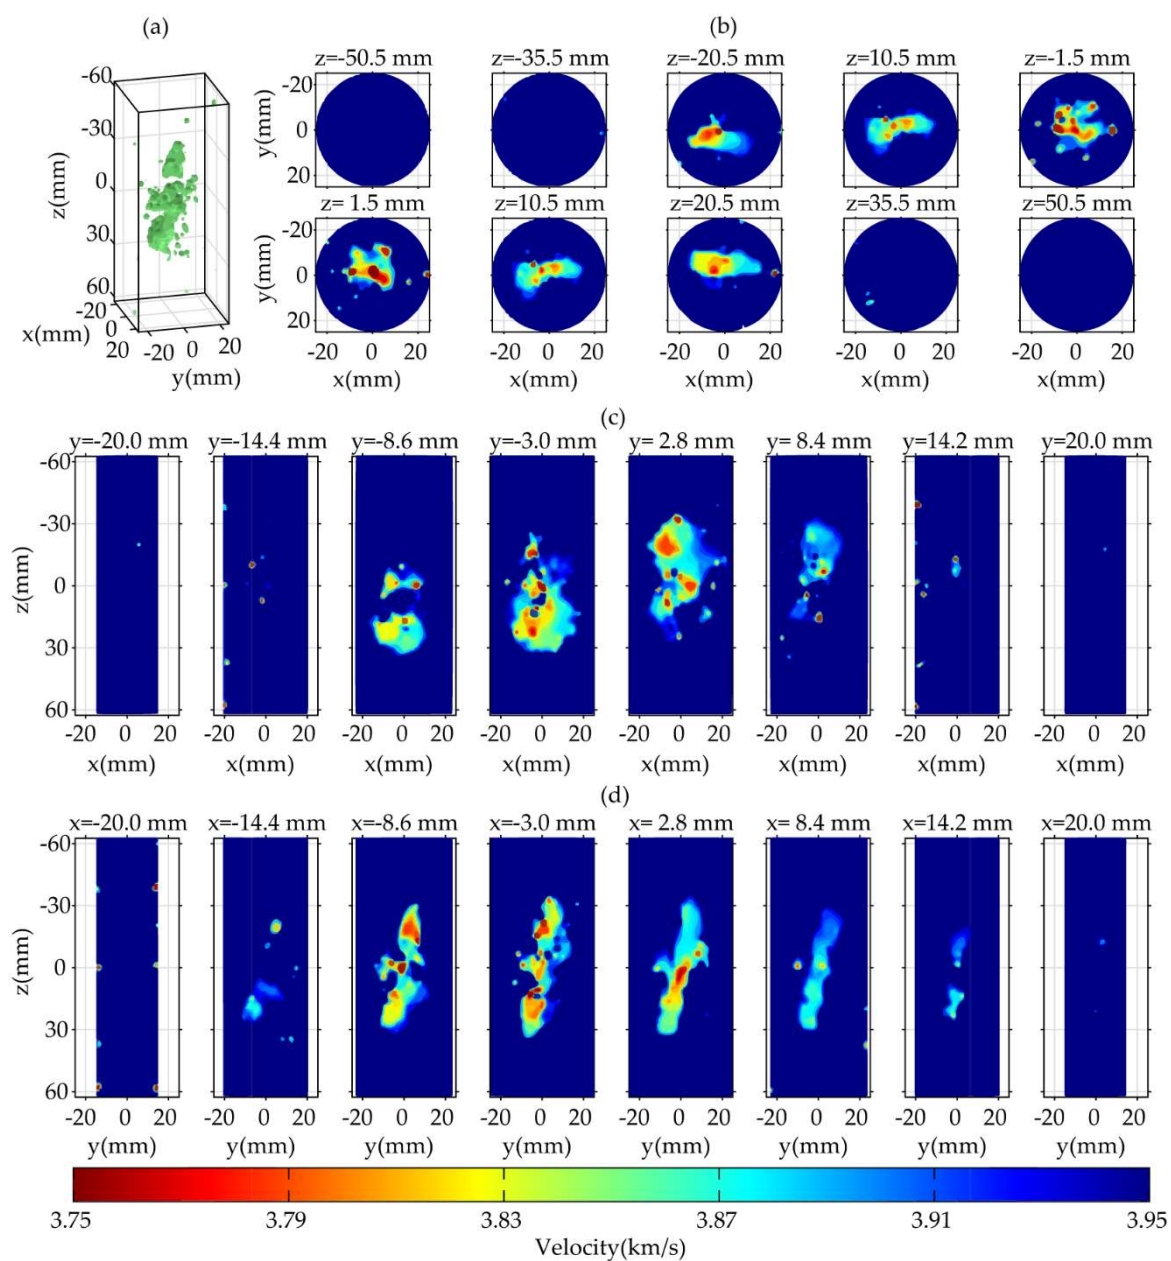

**Figure S8.** Tomographic images of TVR under sparse ray-coverage (RNL=3%). (a) the 3D segmented image; (b) the transverse-view profile; (c) the coronal-view profile; and (d) the sagittal-view profile. The caption of each sub-image in (b–d) represents the profile position.



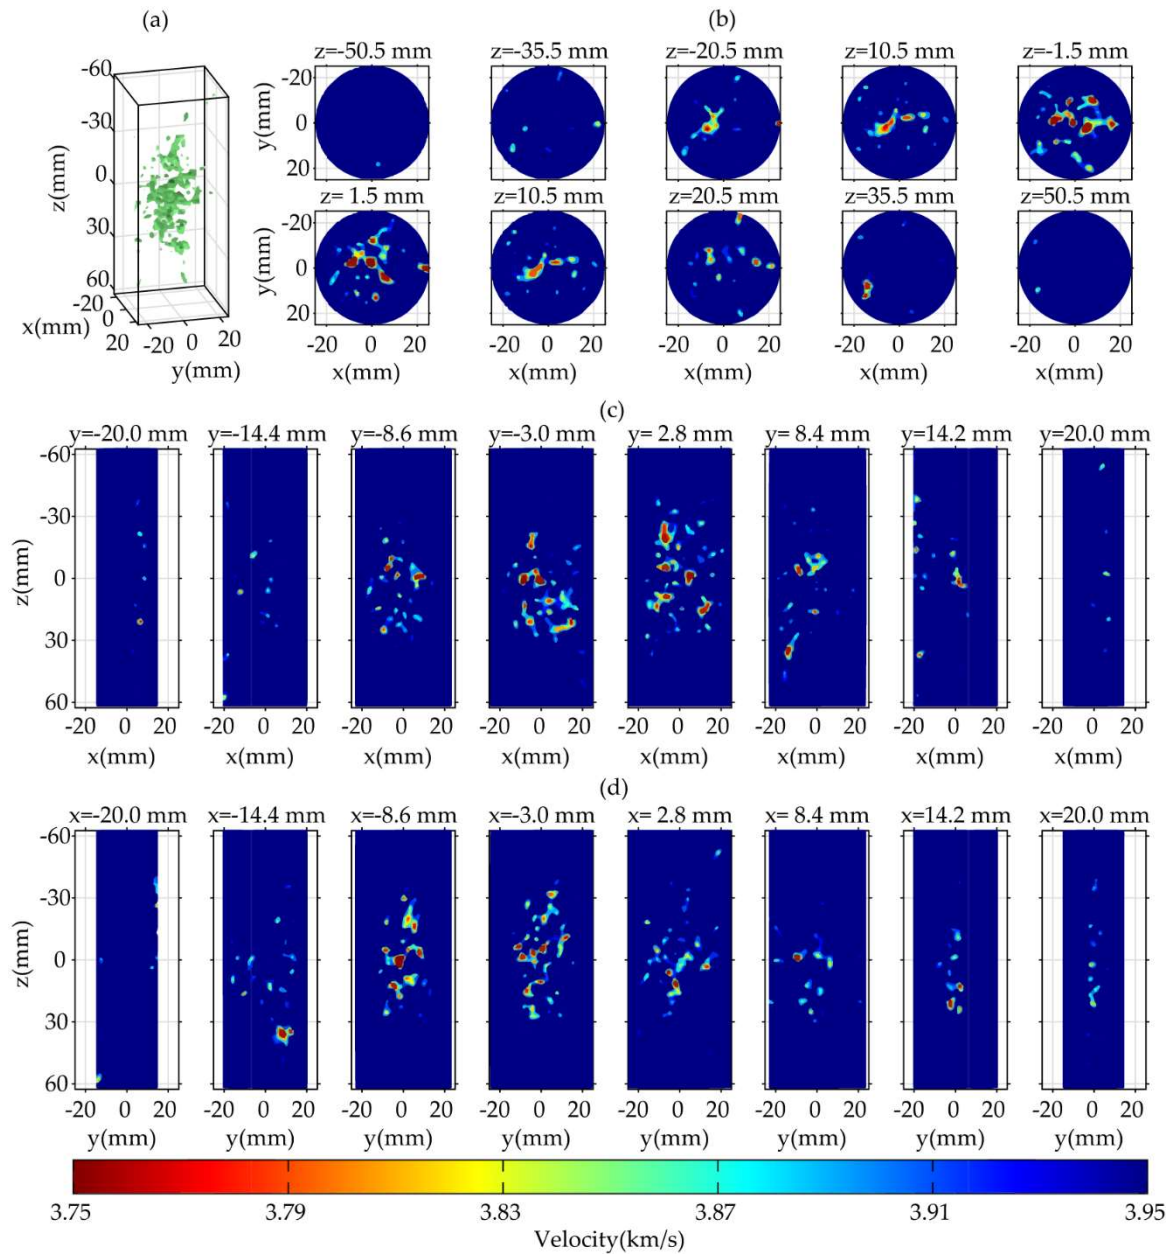

**Figure S9.** Tomographic images of Tikh under sparse ray coverage case (RNL=5%). (a) the 3D segmented image; (b) the transverse-view profile; (c) the coronal-view profile; and (d) the sagittal-view profile. The caption of each sub-image in (b–d) represents the profile position.

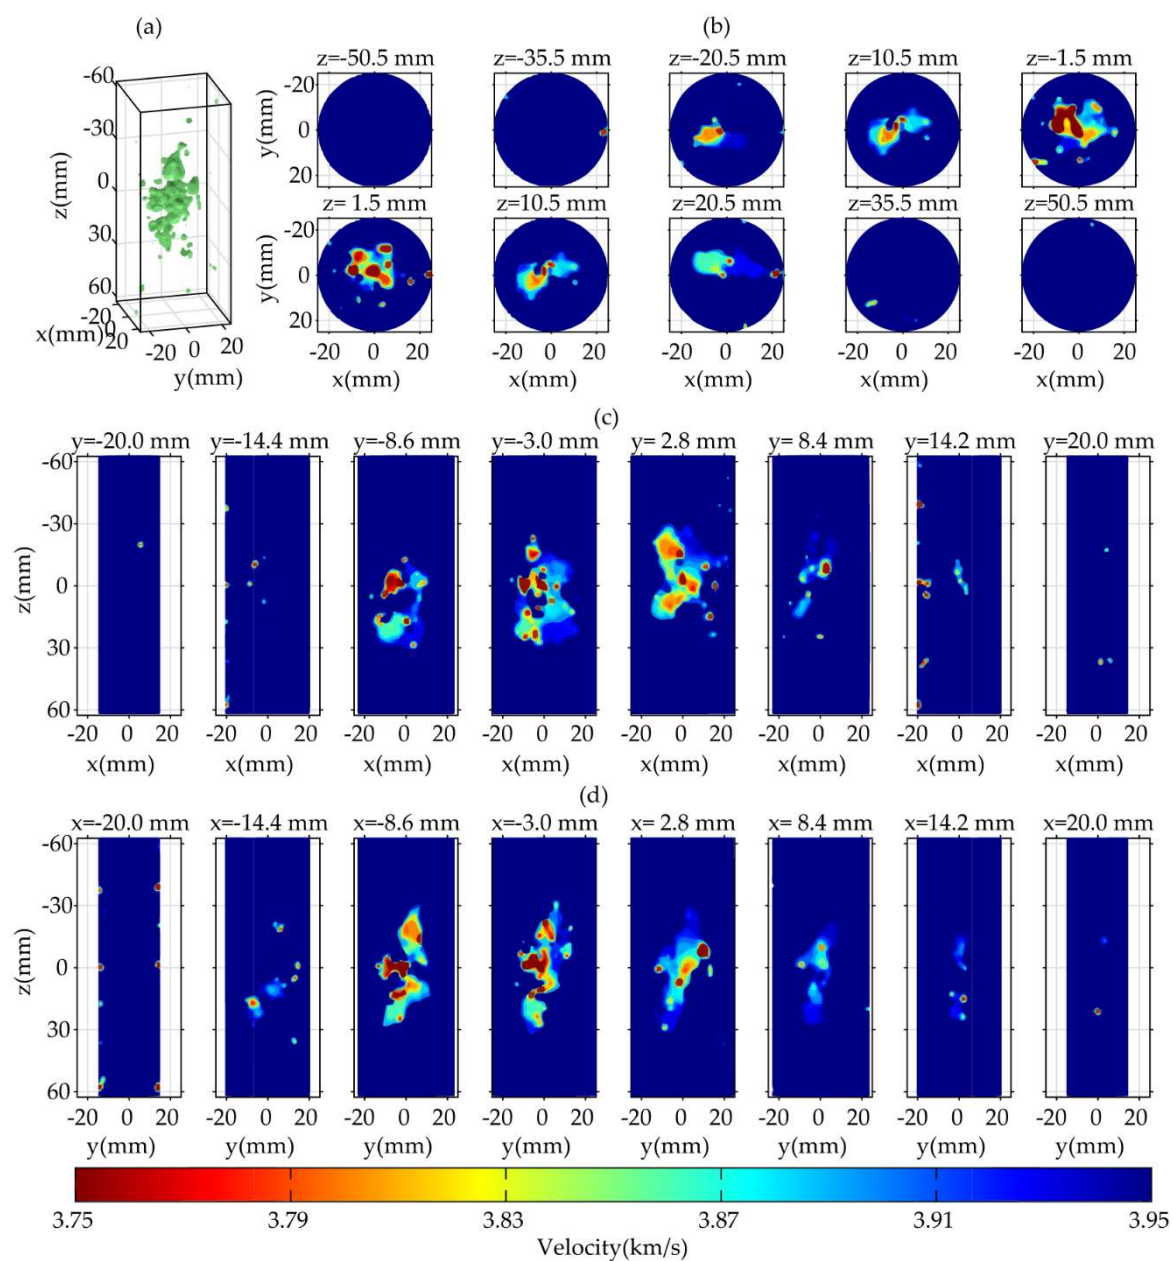

**Figure S10.** Tomographic images of TVR under sparse ray-coverage (RNL=5%). (a) the 3D segmented image; (b) the transverse-view profile; (c) the coronal-view profile; and (d) the sagittal-view profile. The caption of each sub-image in (b–d) represents the profile position.
